# Supplementary material for: Comparison of the Regenerative Metabolic Efficiency of Lipid Extracts from Microalgae Nannochloropsis oceanica and Chlorococcum amblystomatis on Fibroblasts
Source: MDPI journal article supplement (doi:10.3390/antiox13030276), 2024-02-24
Supplement: s1 [file s1]

# Supplementary Table S1

Phospholipid (PL), glycolipid (GL) and other lipidic components contents in the lipid extracts of *Nannochloropsis oceanica* and *Chlorococcum amblystomatis* expressed as mg of lipid per g of lipid extract.

|                                   | Phospholipid<br>content (mg.g <sup>-1</sup><br>of extract) | Glycolipid<br>content (mg.g <sup>-1</sup><br>of extract) | Other components content<br>(neutral lipids, betaine lipids and<br>pigments; mg.g <sup>-1</sup> of extract) |
|-----------------------------------|------------------------------------------------------------|----------------------------------------------------------|-------------------------------------------------------------------------------------------------------------|
| <i>Chlorococcum amblystomatis</i> | 102.1±14.7                                                 | 674.0±69.9                                               | 223.9 ± 63.1                                                                                                |
| <i>Nannochloropsis oceanica</i>   | 122.6±23.8                                                 | 159.7 ± 16.1                                             | 717.7 ± 22.4                                                                                                |
