# Supplementary material for: Comparison of the Regenerative Metabolic Efficiency of Lipid Extracts from Microalgae Nannochloropsis oceanica and Chlorococcum amblystomatis on Fibroblasts
Source: MDPI journal article supplement (doi:10.3390/antiox13030276), 2024-02-24
Supplement: s1 [file s1]

Supplementary Table S3

Polar lipid composition of the lipid extracts of *Chlorococcum amblystomatis* identified by HILIC-ESI-MS and HILIC-ESI-MS/MS in positive ion mode, as  $[M+H]^+$  and  $[M+NH_4]^+$  ions, and in negative ion mode, as  $[M-H]^-$ . When the fatty acyl chain combination was not possible to assign the lines were filled with "-".

| Lipid species<br>(C:N)     | Calculated<br>m/z | Fatty acyl<br>chains (C:N) | Lipid species<br>(C:N)      | Calculated<br>m/z | Fatty acyl<br>chains (C:N) |
|----------------------------|-------------------|----------------------------|-----------------------------|-------------------|----------------------------|
| PC identified as $[M+H]^+$ |                   |                            | LPC identified as $[M+H]^+$ |                   |                            |
| PC(28:1)                   | 676,4917          | -                          | LPC(14:0)                   | 468,309           | -                          |
| PC(30:3)                   | 700,4917          | -                          | LPC(16:0)                   | 496,3403          | -                          |
| PC(30:1)                   | 704,523           | 16:1-14:0                  | LPC(16:1)                   | 494,3247          | 16:1                       |
| PC(30:0)                   | 706,5387          | -                          | LPC(16:2)                   | 492,309           | -                          |
| PC(32:1)                   | 732,5543          | 16:0-16:1                  | LPC(18:1)                   | 522,356           | 18:1                       |
| PC(32:2)                   | 730,5387          | 16:1-16:1                  | LPC(18:2)                   | 520,3403          | 18:2                       |
| PC(32:3)                   | 728,523           | 16:1-16:2                  | LPC(18:3)                   | 518,3247          | -                          |
| PC(32:4)                   | 726,5074          | -                          | LPC(18:4)                   | 516,309           | -                          |
| PC(32:5)                   | 724,4917          | -                          | LPC(20:3)                   | 546,356           | -                          |
| PC(34:1)                   | 760,5856          | 16:0-18:1                  | LPC(20:4)                   | 544,3403          | -                          |
|                            |                   | 16:1-18:0                  | LPC(20:5)                   | 542,3247          | -                          |
| PC(34:2)                   | 758,57            | 16:1-18:1                  |                             |                   |                            |
|                            |                   | 16:0-18:2                  |                             |                   |                            |
| PC(34:3)                   | 756,5543          | 16:1-18:2                  |                             |                   |                            |
| PC(34:4)                   | 754,5387          | 16:1-18:3                  |                             |                   |                            |
|                            |                   | 16:2-18:2                  |                             |                   |                            |
| PC(34:5)                   | 752,523           | -                          |                             |                   |                            |
| PC(34:6)                   | 750,5074          | -                          |                             |                   |                            |
| PC(34:7)                   | 748,4917          | -                          |                             |                   |                            |
| PC(36:2)                   | 786,6013          | -                          |                             |                   |                            |
| PC(36:3)                   | 784,5856          | 18:1-18:2                  |                             |                   |                            |
| PC(36:4)                   | 782,57            | 18:2-18:2                  |                             |                   |                            |
|                            |                   | 16:0-20:4                  |                             |                   |                            |
| PC(36:5)                   | 780,5543          | 18:2-18:3                  |                             |                   |                            |
|                            |                   | 16:0-20:5                  |                             |                   |                            |
|                            |                   | 16:1-20:4                  |                             |                   |                            |
| PC(36:6)                   | 778,5387          | 16:1-20:5                  |                             |                   |                            |
| PC(36:7)                   | 776,523           | -                          |                             |                   |                            |
| PC(38:5)                   | 808,5856          | 18:1-20:4                  |                             |                   |                            |
| PC(38:6)                   | 806,57            | 18:2-20:4                  |                             |                   |                            |
|                            |                   | 18:1-20:5                  |                             |                   |                            |
| PC(38:7)                   | 804,5543          | 18:2-20:5                  |                             |                   |                            |
| PC(38:8)                   | 802,5387          | -                          |                             |                   |                            |
| PC(38:9)                   | 800,523           | -                          |                             |                   |                            |
| PC(40:10)                  | 826,5387          | -                          |                             |                   |                            |
| PC(40:5)                   | 836,6169          | -                          |                             |                   |                            |
| PC(40:7)                   | 832,5856          | -                          |                             |                   |                            |
| PC(40:8)                   | 830,57            | -                          |                             |                   |                            |
| PC(40:9)                   | 828,5543          | -                          |                             |                   |                            |

  

| Lipid species<br>(C:N)                                     | Calculated<br>m/z | Fatty acyl<br>chains (C:N) |
|------------------------------------------------------------|-------------------|----------------------------|
| PE identified as $[M+H]^+$ - polar head<br>as neutral loss |                   |                            |
| PE(30:1)                                                   | 662,4761          | 14:0-16:1                  |
| PE(30:3)                                                   | 658,4448          | -                          |
| PE(32:1)                                                   | 690,5074          | -                          |
| PE(32:2)                                                   | 688,4917          | 16:1-16:1                  |
| PE(32:4)                                                   | 684,4604          | 16:0-16:4                  |
| PE(34:1)                                                   | 718,5387          | 16:0-18:1                  |
| PE(34:2)                                                   | 716,523           | 16:1-18:1                  |
|                                                            |                   | 16:0-18:2                  |
| PE(34:3)                                                   | 714,5074          | -                          |
| PE(34:4)                                                   | 712,4917          | 16:0-18:4                  |
| PE(34:5)                                                   | 710,4761          | 16:1-18:4                  |
| PE(36:2)                                                   | 744,5543          | 18:1-18:1                  |
| PE(36:5)                                                   | 738,5074          | 18:1-18:4                  |
| PE(36:6)                                                   | 736,4917          | -                          |

| Lipid species<br>(C:N)                                               | Calculated<br>m/z | Fatty acyl<br>chains (C:N) |
|----------------------------------------------------------------------|-------------------|----------------------------|
| LPE identified as [M+H] <sup>+</sup> - polar head<br>as neutral loss |                   |                            |
| LPE(14:0)                                                            | 426,2621          | -                          |
| LPE(16:0)                                                            | 454,2934          | 16:0                       |
| LPE(16:1)                                                            | 452,2777          | -                          |
| LPE(16:4)                                                            | 446,2308          | -                          |
| LPE(18:1)                                                            | 480,309           | 18:1                       |
| LPE(18:2)                                                            | 478,2934          | -                          |
| LPE(18:3)                                                            | 476,2777          | -                          |
| LPE(18:4)                                                            | 474,2621          | 18:4                       |
| LPE(20:5)                                                            | 500,2777          | -                          |

| Lipid species<br>(C:N)              | Calculated<br>m/z | Fatty acyl<br>chains (C:N)                                           |
|-------------------------------------|-------------------|----------------------------------------------------------------------|
| PG identified as [M-H] <sup>-</sup> |                   |                                                                      |
| PG(30:0)                            | 693,4707          | 14:0-16:0                                                            |
| PG(30:1)                            | 691,455           | -                                                                    |
| PG(32:0)                            | 721,502           | -                                                                    |
| PG(32:1)                            | 719,4863          | 16:1-16:0<br>14:0-18:1                                               |
| PG(32:2)                            | 717,4707          | 16:1-16:1                                                            |
| PG(34:1)                            | 747,5176          | 16:0-18:1                                                            |
| PG(34:2)                            | 745,502           | -                                                                    |
| PG(34:3)                            | 743,4867          | 16:0-18:3                                                            |
| PG(34:4)                            | 741,4707          | 16:0-18:4<br>16:1-18:3                                               |
| PG(34:5)                            | 739,455           | 14:0-20:5<br>16:2-18:3                                               |
| PG(36:2)                            | 773,5333          | 18:1-18:1                                                            |
| PG(36:5)                            | 767,4864          | 16:0-20:5                                                            |
| PG(36:6)                            | 765,4707          | 16:1-20:5                                                            |
| PG(38:5)                            | 795,5176          | -                                                                    |
| PG(32:2-OH)                         | 733,4656          | (16:0-OH)-16:2                                                       |
| PG(34:1-OH)                         | 763,5125          | (18:0-OH)-16:1                                                       |
| PG(34:2-OH)                         | 761,4969          | (18:0-OH)-16:2                                                       |
| PG(34:3-OH)                         | 759,4812          | (18:3-OH)-16:0<br>(18:2-OH)-16:1<br>(18:1-OH)-16:2<br>(18:0-OH)-16:3 |
| PG(34:4-OH)                         | 757,4656          | (18:4-OH)-16:0<br>(18:3-OH)-16:1<br>(18:2-OH)-16:2                   |
| PG(34:5-OH)                         | 755,4499          | (18:3-OH)-16:2<br>(18:4-OH)-16:1                                     |
| PG(36:5-OH)                         | 783,4812          | (16:0-OH)-20:5<br>(20:5-OH)-16:0                                     |
| PG(36:6-OH)                         | 781,4656          | (20:5-OH)-16:1                                                       |

| Lipid species<br>(C:N)              | Calculated<br>m/z | Fatty acyl<br>chains (C:N) |
|-------------------------------------|-------------------|----------------------------|
| PI identified as [M-H] <sup>-</sup> |                   |                            |
| PI(32:1)                            | 807,5024          | 16:0-16:1                  |
| PI(34:1)                            | 835,5318          | 16:0-18:1                  |
| PI(32:1)                            | 807,5024          | 16:0-16:1                  |

| Lipid species<br>(C:N)                | Calculated<br>m/z | Fatty acyl<br>chains (C:N) |
|---------------------------------------|-------------------|----------------------------|
| MGTS identified as [M+H] <sup>+</sup> |                   |                            |
| MGTS(14:0)                            | 446,3482          | 14:0                       |
| MGTS(14:1)                            | 444,3325          | 14:1                       |
| MGTS(16:0)                            | 474,3795          | 16:0                       |
| MGTS(16:1)                            | 472,3638          | 16:1                       |
| MGTS(16:2)                            | 470,3482          | 16:2                       |
| MGTS(16:3)                            | 468,3325          | -                          |
| MGTS(16:4)                            | 466,3169          | 16:4                       |
| MGTS(18:0)                            | 502,4108          | 18:0                       |
| MGTS(18:1)                            | 500,3951          | 18:1                       |
| MGTS(18:2)                            | 498,3795          | -                          |
| MGTS(18:3)                            | 496,3638          | -                          |
| MGTS(18:4)                            | 494,3482          | 18:4                       |
| MGTS(18:5)                            | 492,3325          | -                          |
| MGTS(20:0)                            | 530,4421          | 20:0                       |
| MGTS(20:4)                            | 522,3795          | -                          |
| MGTS(20:5)                            | 520,3638          | 20:5                       |

| Lipid species<br>(C:N)                | Calculated<br>m/z | Fatty acyl chains<br>(C:N) | Lipid species<br>(C:N)                | Calculated<br>m/z | Fatty acyl chains<br>(C:N) |
|---------------------------------------|-------------------|----------------------------|---------------------------------------|-------------------|----------------------------|
| DGTS identified as [M+H] <sup>+</sup> |                   |                            | DGTS identified as [M+H] <sup>+</sup> |                   |                            |
| DGTS(28:1)                            | 654,5309          | -                          | DGTS(34:3)                            | 734,5935          | 16:2-18:1                  |
| DGTS(30:0)                            | 684,5778          | 16:0-14:0                  |                                       |                   | 16:1-18:2                  |
| DGTS(30:1)                            | 682,5622          | 16:1-16:0                  |                                       |                   | 20:3-14:0                  |
| DGTS(30:2)                            | 680,5465          | 16:2-14:0                  | DGTS(34:4)                            | 732,5778          | 18:4-16:0                  |
| DGTS(30:3)                            | 678,5309          | -                          |                                       |                   | 18:3-16:1                  |
| DGTS(30:4)                            | 676,5152          | 16:4-16:0                  | DGTS(34:5)                            | 730,5622          | 18:4-16:1                  |
| DGTS(30:5)                            | 674,4996          | 16:4-14:1                  |                                       |                   | 18:1-16:4                  |
| DGTS(32:0)                            | 712,6091          | 16:0-16:0                  |                                       |                   | 18:2-16:3                  |
| DGTS(32:1)                            | 710,5935          | 16:1-16:0                  | DGTS(34:5-OH)                         | 746,5571          | (16:4-OH)-18:1             |
| DGTS(32:2)                            | 708,5778          | 16:0-16:2                  |                                       |                   | (16:1-OH)-18:4             |
|                                       |                   | 16:1-16:1                  |                                       |                   | (16:0-OH)-18:5             |
| DGTS(32:3)                            | 706,5622          | 16:3-16:0                  | DGTS(34:6)                            | 728,5465          | -                          |
| DGTS(32:4)                            | 704,5465          | 14:0-18:4                  | DGTS(34:7)                            | 726,5309          | 16:4-18:3                  |
|                                       |                   | 16:4-16:0                  |                                       |                   | 16:3-18:4                  |
|                                       |                   | 16:3-16:1                  | DGTS(34:7-OH)                         | 742,5258          | (16:4-OH)-18:3             |
| DGTS(32:5)                            | 702,5309          | -                          |                                       |                   | (16:3-OH)-18:4             |
| DGTS(32:6)                            | 700,5152          | 16:4-16:2                  | DGTS(34:8)                            | 724,5152          | 16:4-18:4                  |
|                                       |                   | 16:3-16:3                  | DGTS(36:10)                           | 748,5152          | 18:5-18:5                  |
| DGTS(32:7)                            | 698,4996          | 16:4-16:3                  | DGTS(36:4)                            | 760,6091          | 16:0-20:4                  |
| DGTS(32:8)                            | 696,4839          | 16:4-16:4                  |                                       |                   | 18:3-18:1                  |
| DGTS(34:1)                            | 738,6248          | 16:0-18:1                  |                                       |                   | 18:2-18:2                  |
| DGTS(34:2)                            | 736,6091          | 16:1-18:1                  |                                       |                   | 20:3-16:1                  |
|                                       |                   | 18:2-16:0                  |                                       |                   | 20:2-16:2                  |
|                                       |                   | 20:2-14:0                  |                                       |                   | 20:1-16:3                  |
|                                       |                   |                            |                                       |                   | 20:0-16:4                  |
|                                       |                   |                            | DGTS(36:5)                            | 758,5935          | 18:4-18:1                  |
|                                       |                   |                            |                                       |                   | 20:5-16:0                  |
|                                       |                   |                            |                                       |                   | 20:4-16:1                  |
|                                       |                   |                            |                                       |                   | 20:3-16:2                  |
|                                       |                   |                            |                                       |                   | 20:2-16:3                  |
|                                       |                   |                            |                                       |                   | 20:1-16:4                  |
|                                       |                   |                            |                                       |                   | 16:1-20:4                  |
|                                       |                   |                            | DGTS(36:6)                            | 756,5778          | 16:1-20:5                  |
|                                       |                   |                            |                                       |                   | 20:3-16:3                  |
|                                       |                   |                            |                                       |                   | 18:2-18:4                  |
|                                       |                   |                            |                                       |                   | 18:3-18:3                  |
|                                       |                   |                            | DGTS(36:7)                            | 754,5622          | 18:4-18:3                  |
|                                       |                   |                            | DGTS(36:8)                            | 752,5465          | 18:4-18:4                  |
|                                       |                   |                            | DGTS(36:9)                            | 750,5309          | 18:5-18:4                  |
|                                       |                   |                            | DGTS(38:10)                           | 776,5465          | 20:5-18:5                  |
|                                       |                   |                            | DGTS(38:7)                            | 782,5935          | 20:5-18:2                  |
|                                       |                   |                            | DGTS(38:8)                            | 780,5778          | 20:5-18:3                  |
|                                       |                   |                            | DGTS(40:10)                           | 804,5778          | 20:5-20:5                  |
|                                       |                   |                            | DGTS(40:9)                            | 806,5935          | 20:4-20:5                  |

| Lipid species<br>(C:N)                | Calculated<br>m/z | Fatty acyl<br>chains (C:N) |
|---------------------------------------|-------------------|----------------------------|
| SQDG identified as [M-H] <sup>-</sup> |                   |                            |
| SQDG(28:0)                            | 737,451           | -                          |
| SQDG(30:0)                            | 765,4823          | 16:0-14:0                  |
| SQDG(30:1)                            | 763,4666          | 16:1-14:0                  |
| SQDG(32:0)                            | 793,5136          | -                          |
| SQDG(32:1)                            | 791,4979          | 16:0-16:1                  |
| SQDG(32:2)                            | 789,4823          | 16:1-16:1                  |
|                                       |                   | 16:0-16:2                  |
| SQDG(32:3)                            | 787,4666          | 16:1-16:2                  |
|                                       |                   | 16:0-16:3                  |
|                                       |                   | 18:1-14:1                  |
| SQDG(32:4)                            | 785,451           | 16:0-16:4                  |
|                                       |                   | 16:1-16:3                  |
|                                       |                   | 16:2-16:2                  |
| SQDG(34:0)                            | 821,5449          | 16:0-18:0                  |
| SQDG(34:1)                            | 819,5292          | 16:0-18:1                  |
| SQDG(34:3)                            | 815,4979          | 16:0-18:3                  |
|                                       |                   | 18:1-16:2                  |
| SQDG(34:4)                            | 813,4823          | 16:0-18:4                  |
|                                       |                   | 16:1-18:3                  |
|                                       |                   | 16:2-18:2                  |
|                                       |                   | 18:1-16:3                  |
|                                       |                   | 20:4-14:0                  |
| SQDG(36:0)                            | 849,5762          | 16:0-20:0                  |
| SQDG(36:3)                            | 843,5292          | -                          |
| SQDG(36:4)                            | 841,5136          | 16:0-20:4                  |
| SQDG(36:5)                            | 839,4979          | -                          |
| SQDG(36:6)                            | 837,4823          | 16:1-20:5                  |
|                                       |                   | 20:4-16:2                  |
|                                       |                   | 18:2-18:4                  |
|                                       |                   | 18:3-18:3                  |
| SQDG(36:7)                            | 835,4666          | 18:3-18:4                  |
|                                       |                   | 20:4-16:3                  |
|                                       |                   | 20:5-16:2                  |
| SQDG(34:3-OH)                         | 831,4928          | -                          |
| SQDG(34:4-OH)                         | 829,4772          | -                          |

| Lipid species<br>(C:N)                               | Calculated<br>m/z | Fatty acyl<br>chains (C:N) |
|------------------------------------------------------|-------------------|----------------------------|
| MGDG identified as [M+NH <sub>4</sub> ] <sup>+</sup> |                   |                            |
| MGDG(30:0)                                           | 720,5625          | -                          |
| MGDG(30:1)                                           | 718,5464          | 16:1-14:0                  |
| MGDG(32:0)                                           | 748,5939          | 16:0-16:0                  |
| MGDG(32:1)                                           | 746,5777          | 16:1-16:0                  |
| MGDG(32:2)                                           | 744,5626          | 16:1-16:1                  |
|                                                      |                   | 14:0-18:2                  |
|                                                      |                   | 16:0-16:2                  |
| MGDG(32:3)                                           | 742,5464          | -                          |
| MGDG(32:4)                                           | 740,5307          | -                          |
| MGDG(32:5)                                           | 738,5156          | -                          |
| MGDG(32:6)                                           | 736,4994          | -                          |
| MGDG(32:7)                                           | 734,4843          | -                          |
| MGDG(32:8)                                           | 732,4687          | 16:4-16:4                  |
| MGDG(34:1)                                           | 774,609           | -                          |
| MGDG(34:2)                                           | 772,5933          | 18:2-16:0                  |
| MGDG(34:3)                                           | 770,5782          | 18:3-16:0                  |
|                                                      |                   | 18:2-16:1                  |
| MGDG(34:4)                                           | 768,5626          | 16:2-18:2                  |
|                                                      |                   | 16:1-18:3                  |
|                                                      |                   | 16:0-18:4                  |
|                                                      |                   | 16:3-18:1                  |
|                                                      |                   | 16:4-18:0                  |
| MGDG(34:5)                                           | 766,5469          | -                          |
| MGDG(34:7)                                           | 762,5156          | 16:4-18:3                  |
|                                                      |                   | 18:4-16:3                  |
| MGDG(34:8)                                           | 760,5             | -                          |
| MGDG(36:3)                                           | 798,6095          | -                          |
| MGDG(36:4)                                           | 796,5933          | -                          |
| MGDG(36:5)                                           | 794,5782          | 18:3-18:2                  |
|                                                      |                   | 18:1-18:4                  |
|                                                      |                   | 20:5-16:0                  |
|                                                      |                   | 16:4-20:2                  |
|                                                      |                   | 16:1-20:4                  |
| MGDG(36:6)                                           | 792,5625          | 18:3-18:3                  |
|                                                      |                   | 16:1-20:5                  |
|                                                      |                   | 16:4-20:2                  |
| MGDG(36:7)                                           | 790,5469          | -                          |
| MGDG(36:8)                                           | 788,5313          | -                          |
| MGDG(38:6)                                           | 820,5939          | 18:1-20:5                  |
|                                                      |                   | 18:2-20:4                  |
|                                                      |                   | 18:3-20:3                  |
| MGDG(38:7)                                           | 818,5782          | 20:5-18:2                  |
|                                                      |                   | 18:3-20:4                  |
| MGDG(38:8)                                           | 816,5626          | -                          |
| MGDG(40:10)                                          | 840,5626          | 20:5-20:5                  |
| MGDG(40:8)                                           | 844,5939          | 20:4-20:4                  |
| MGDG(40:7)                                           | 846,6095          | -                          |

| Lipid species<br>(C:N)                        | Calculated<br>m/z | Fatty acyl<br>chains (C:N) |
|-----------------------------------------------|-------------------|----------------------------|
| <b>DGDG identified as [M+NH4]<sup>+</sup></b> |                   |                            |
| DGDG(30:0)                                    | 882,6154          | -                          |
| DGDG(30:1)                                    | 880,5997          | 16:1-14:0                  |
| DGDG(32:1)                                    | 908,631           | 16:0-16:1                  |
| DGDG(32:2)                                    | 906,6154          | 16:0-16:2                  |
|                                               |                   | 16:1-16:1                  |
| DGDG(32:3)                                    | 904,5997          | 18:3-14:0                  |
|                                               |                   | 16:0-16:3                  |
|                                               |                   | 16:1-16:2                  |
| DGDG(32:4)                                    | 902,5841          | 18:3-14:1                  |
|                                               |                   | 16:0-16:4                  |
|                                               |                   | 14:0-18:4                  |
| DGDG(32:5)                                    | 900,5684          | 16:1-16:4                  |
| DGDG(32:6)                                    | 898,5528          | -                          |
| DGDG(34:1)                                    | 936,6623          | 18:1-16:0                  |
| DGDG(34:2)                                    | 934,6467          | 18:1-16:1                  |
|                                               |                   | 18:2-16:0                  |
| DGDG(34:3)                                    | 932,631           | 16:0-18:3                  |
|                                               |                   | 18:1-16:2                  |
| DGDG(34:4)                                    | 930,6154          | 18:1-16:3                  |
|                                               |                   | 18:2-16:2                  |
|                                               |                   | 18:3-16:1                  |
|                                               |                   | 18:4-16:0                  |
|                                               |                   | 14:0-20:4                  |
| DGDG(34:5)                                    | 928,5997          | 18:3-16:2                  |
|                                               |                   | 18:2-16:3                  |
|                                               |                   | 18:1-16:4                  |
|                                               |                   | 16:1-18:4                  |
|                                               |                   | 14:0-20:5                  |
| DGDG(34:6)                                    | 926,5841          | -                          |
| DGDG(34:7)                                    | 924,5684          | 18:3-16:4                  |
|                                               |                   | 18:4-16:3                  |
| DGDG(34:8)                                    | 922,5528          | -                          |
| DGDG(36:2)                                    | 962,678           | -                          |
| DGDG(36:3)                                    | 960,6623          | 18:3-18:0                  |
|                                               |                   | 18:1-18:2                  |
| DGDG(36:4)                                    | 958,6467          | -                          |
| DGDG(36:5)                                    | 956,631           | 20:5-16:0                  |
|                                               |                   | 18:1-18:4                  |
|                                               |                   | 20:1-16:4                  |
| DGDG(36:6)                                    | 954,6154          | 18:3-18:3                  |
|                                               |                   | 20:5-16:1                  |
|                                               |                   | 18:4-18:2                  |
| DGDG(36:7)                                    | 952,5997          | 18:3-18:4                  |
| DGDG(36:8)                                    | 950,5841          | 18:4-18:4                  |
| DGDG(38:6)                                    | 982,6467          | -                          |
| DGDG(38:7)                                    | 980,631           | 18:2-20:5                  |
| DGDG(40:10)                                   | 1002,6154         | 20:5-20:5                  |
| DGDG(40:9)                                    | 1004,631          | -                          |

| Lipid species<br>(C:N)                        | Calculated<br>m/z | Fatty acyl<br>chains (C:N) |
|-----------------------------------------------|-------------------|----------------------------|
| <b>MGMG identified as [M+NH4]<sup>+</sup></b> |                   |                            |
| MGMG(14:0)                                    | 482,3329          | 14:0                       |
| MGMG(16:0)                                    | 510,3642          | 16:0                       |
| MGMG(16:1)                                    | 508,3486          | 16:1                       |
| MGMG(16:3)                                    | 504,3173          | **                         |
| MGMG(16:4)                                    | 502,3016          | 16:4                       |
| MGMG(16:4-OH)                                 | 518,2965          | 16:4-OH                    |
| MGMG(18:1)                                    | 536,3799          | 18:1                       |
| MGMG(18:3)                                    | 532,3486          | 18:3                       |
| MGMG(18:4)                                    | 530,3329          | -                          |
| MGMG(20:4)                                    | 558,3642          | -                          |
| MGMG(20:5)                                    | 556,3486          | -                          |

| Lipid species<br>(C:N)                        | Calculated<br>m/z | Fatty acyl<br>chains (C:N) |
|-----------------------------------------------|-------------------|----------------------------|
| <b>DGMG identified as [M+NH4]<sup>+</sup></b> |                   |                            |
| DGMG(14:0)                                    | 644,3857          | -                          |
| DGMG(16:0)                                    | 672,417           | 16:0                       |
| DGMG(16:1)                                    | 670,4014          | 16:1                       |
| DGMG(16:2)                                    | 668,3857          | -                          |
| DGMG(16:3)                                    | 666,3701          | -                          |
| DGMG(16:4)                                    | 664,3544          | -                          |
| DGMG(18:1)                                    | 698,4327          | 18:1                       |
| DGMG(18:2)                                    | 696,417           | -                          |
| DGMG(18:3)                                    | 694,4014          | 18:3                       |
| DGMG(18:4)                                    | 692,3857          | -                          |
| DGMG(20:5)                                    | 718,4014          | -                          |
| DGMG(14:0)                                    | 644,3857          | -                          |

| Lipid species<br>(C:N)                      | Calculated<br>m/z | Fatty acyl<br>chains (C:N) |
|---------------------------------------------|-------------------|----------------------------|
| <b>SQMG identified as [M-H]<sup>-</sup></b> |                   |                            |
| SQMG(16:0)                                  | 555,2839          | -                          |

| Lipid species<br>(C:N)                        | Calculated<br>m/z | Fatty acyl<br>chains (C:N) |
|-----------------------------------------------|-------------------|----------------------------|
| <b>PI-Cer identified as [M-H]<sup>-</sup></b> |                   |                            |
| PI-Cer(d18:1/14:0)                            | 750,4921          | -                          |

***Abbreviations:***

**PC**, phosphatidylcholine;

**PE**, phosphatidylethanolamine;

**PG**, phosphatidylglycerol;

**PI**, phosphatidylinositol;

**LPC**, lysophosphatidylcholine;

**LPE**, lysophosphatidylethanolamine;

**LPG**, lysophosphatidylglycerol;

**MGTS**, monoacylglyceryl 3-O-4'-(N,N,N-trimethyl) homoserine;

**DGTS**, diacylglyceryl 3-O-4'-(N,N,N-trimethyl) homoserine;

**SQDG**, sulfoquinovosyldiacylglycerol;

**MGDG**, monogalactosyldiacylglycerol;

**DGDG**, digalactosyldiacylglycerol;

**MGMG**, monogalactosylmonoacylglycerol;

**DGMG**, digalactosylmonoacylglycerol;

**SQMG**, sulfoquinovosylmonoacylglycerol;

**PI-Cer**, inositolphosphoceramide.
